# Supplementary material for: Lack of Associations between Environmental Exposures and Environmental Enteric Dysfunction among 18-Month-Old Children in Rural Malawi
Source: MDPI journal article supplement (doi:10.3390/ijerph191710891), 2022-09-01
Supplement: s1 [file s1]

**Table S1.** Pearson's correlations between biomarkers of intestinal health <sup>†</sup>.

|                     | Calprotectin<br>N=620 |          | §REG1B<br>N=620 |          | Alpha-1-antitrypsin<br>N=620 |         |
|---------------------|-----------------------|----------|-----------------|----------|------------------------------|---------|
|                     | Coefficient           | p-Value  | Coefficient     | p-Value  | Coefficient                  | p-Value |
| Calprotectin        | 1                     | --       | --              | --       | --                           | --      |
| §REG1B              | 0.19                  | <0.001** | 1               | --       | --                           | --      |
| Alpha-1-antitrypsin | 0.57                  | <0.001** | 0.20            | <0.001** | 1                            | --      |

<sup>†</sup> Results were from Pearson's correlation analysis. \*\* *p*-value < 0.01. § REG1B, regenerating 1B protein

**Table S2.** Values of VIF for environmental exposures <sup>†</sup>.

| Environmental Exposure | VIF <sup>§</sup> | VIF when Excluding Variable "Roofing Material" |
|------------------------|------------------|------------------------------------------------|
| Drinking water source  | 1.02             | 1.02                                           |
| Sanitary facility      | 1.14             | 1.11                                           |
| Exposure to chickens   | 1.09             | 1.08                                           |
| Exposure to goats      | 1.10             | 1.10                                           |
| Exposure to cows       | 1.05             | 1.04                                           |
| Wall material          | 1.52             | 1.12                                           |
| Roofing material       | 1.71             | -                                              |
| Season                 | 1.06             | 1.06                                           |
| Residential area       | 1.30             | 1.29                                           |
| Food insecurity        | 1.15             | 1.15                                           |

<sup>†</sup> VIF was calculated from multivariable regression models. § VIF, variance inflation factor.

**Table S3.** Associations between environmental exposures and intestinal biomarkers in multivariable analysis after imputation <sup>†</sup>.

| Environmental Exposures                                                               | Calprotectin      |         | § REG1B            |         | Alpha-1-antitrypsin |         |
|---------------------------------------------------------------------------------------|-------------------|---------|--------------------|---------|---------------------|---------|
|                                                                                       | Coef. (95%CI)     | p-Value | Coef. (95%CI)      | p-Value | Coef. (95%CI)       | p-Value |
|                                                                                       | N=620             |         | N=620              |         | N=620               |         |
| Well, lake and river as drinking water source ( <i>vs. piped water and borehole</i> ) | -0.17(-0.46,0.12) | 0.255   | -0.06(-0.52,0.39)  | 0.781   | 0.06(-0.17,0.30)    | 0.597   |
| Regular pit latrine and none ( <i>vs. improved latrine</i> )                          | -0.26(-0.59,0.07) | 0.117   | -0.14(-0.66,0.37)  | 0.585   | -0.09(-0.35,0.18)   | 0.521   |
| Exposure to chicken ( <i>vs. not exposure</i> )                                       | 0.04(-0.15,0.22)  | 0.702   | 0.06(-0.24,0.35)   | 0.706   | 0.07(-0.08,0.22)    | 0.360   |
| Exposure to goats ( <i>vs. not exposure</i> )                                         | -0.01(-0.24,0.21) | 0.899   | -0.20(-0.55,0.15)  | 0.258   | -0.00(-0.18,0.18)   | 0.975   |
| Exposure to cows ( <i>vs. not exposure</i> )                                          | 0.23(-0.35,0.81)  | 0.431   | 0.61(-0.29,1.51)   | 0.186   | -0.01(-0.47,0.46)   | 0.979   |
| Poor quality wall material of the main house ( <i>vs. burnt brick</i> )               | -0.10(-0.30,0.11) | 0.350   | 0.16(-0.16,0.47)   | 0.324   | -0.07(-0.24,0.09)   | 0.386   |
| Season ( <i>vs. Cold-dry</i> )                                                        |                   |         |                    |         |                     |         |
| Rainy                                                                                 | 0.39(0.15,0.63)   | 0.002** | -0.02(-0.40,0.36)  | 0.931   | 0.16(-0.04,0.35)    | 0.112   |
| Hot-dry                                                                               | 0.40(0.17,0.63)   | 0.001** | 0.03(-0.33,0.40)   | 0.855   | 0.10(-0.09,0.29)    | 0.285   |
| Residential area ( <i>vs. Lungwena</i> )                                              |                   |         |                    |         |                     |         |
| Malindi                                                                               | 0.01(-0.26,0.29)  | 0.925   | -0.21(-0.64,0.21)  | 0.326   | -0.00(-0.22,0.22)   | 0.992   |
| Mangochi                                                                              | -0.10(-0.34,0.14) | 0.426   | -0.55(-0.93,-0.17) | 0.005** | -0.01(-0.21,0.19)   | 0.927   |
| Food insecurity ( <i>vs. food secure</i> )                                            |                   |         |                    |         |                     |         |
| Mildly food insecure                                                                  | 0.04(-0.31,0.40)  | 0.811   | 0.12(-0.44,0.67)   | 0.675   | 0.01(-0.28,0.30)    | 0.938   |
| Moderately food insecure                                                              | 0.03(-0.27,0.33)  | 0.856   | 0.05(-0.42,0.51)   | 0.847   | -0.06(-0.30,0.19)   | 0.642   |
| Severely food insecure                                                                | 0.10(-0.19,0.40)  | 0.484   | -0.14(-0.59,0.32)  | 0.551   | 0.08(-0.15,0.32)    | 0.486   |

<sup>†</sup> Results were from multivariable regression models adjusted for other environmental exposures from bivariate analysis, maternal age, educational achievement, HIV infection status, child sex, WLZ and LAZ at 18 months, continued breastfeeding status, antibiotic use and dietary intervention. \*\* *p*-value < 0.01 § REG1B, regenerating 1B protein.

**Table S4.** Associations between breastfeeding, antibiotic use, and dietary intervention and intestinal biomarkers in multivariable analysis <sup>†</sup>.

| Variable                                                 | Calprotectin       |         | § REG1B           |         | Alpha-1-antitrypsin |         |
|----------------------------------------------------------|--------------------|---------|-------------------|---------|---------------------|---------|
|                                                          | Coef. (95%CI)      | p-Value | Coef. (95%CI)     | p-Value | Coef. (95%CI)       | p-Value |
| Continued breastfeeding ( <i>vs. no breastfeeding</i> )  | -0.19(-0.58,0.21)  | 0.350   | 0.49(-0.09,1.08)  | 0.098   | -0.28(-0.59,0.03)   | 0.071   |
| Antibiotic use ( <i>above vs. below median days</i> )    | -0.31(-0.50,-0.11) | 0.002** | -0.01(-0.31,0.30) | 0.964   | -0.21(-0.36,-0.05)  | 0.009** |
| Dietary intervention (SQ-LNS <i>vs. no supplements</i> ) | -0.04(-0.23,0.15)  | 0.685   | 0.06(-0.24,0.37)  | 0.689   | -0.00(-0.16,0.16)   | 0.979   |

<sup>†</sup> Results were from multivariable regression models. \*\**p*-value < 0.01. § REG1B, regenerating 1B protein.
